# Supplementary material for: Nitrogen-doped graphene-supported copper complex: a novel photocatalyst for CO2reduction under visible light irradiation
Source: Royal Society of Chemistry journal article supplement (doi:10.1039/c5ra05319f), 2015-01-01
Supplement: c5ra05319f1.pdf [file c5ra05319f1.pdf]

Supporting Information

for

**Nitrogen-Doped Graphene-Supported Copper Complex: A Novel  
Photocatalyst for CO<sub>2</sub> Reduction under Visible Light Irradiation**

**Pawan Kumar<sup>#</sup>, Harshal P. Mungse<sup>#</sup>, Om P. Khatri and Suman L. Jain<sup>\*</sup>**

Chemical Science Division, Indian Institute of Petroleum, Dehradun - 248005, India

Email: [suman@iip.res.in](mailto:suman@iip.res.in)

**Figure S1**

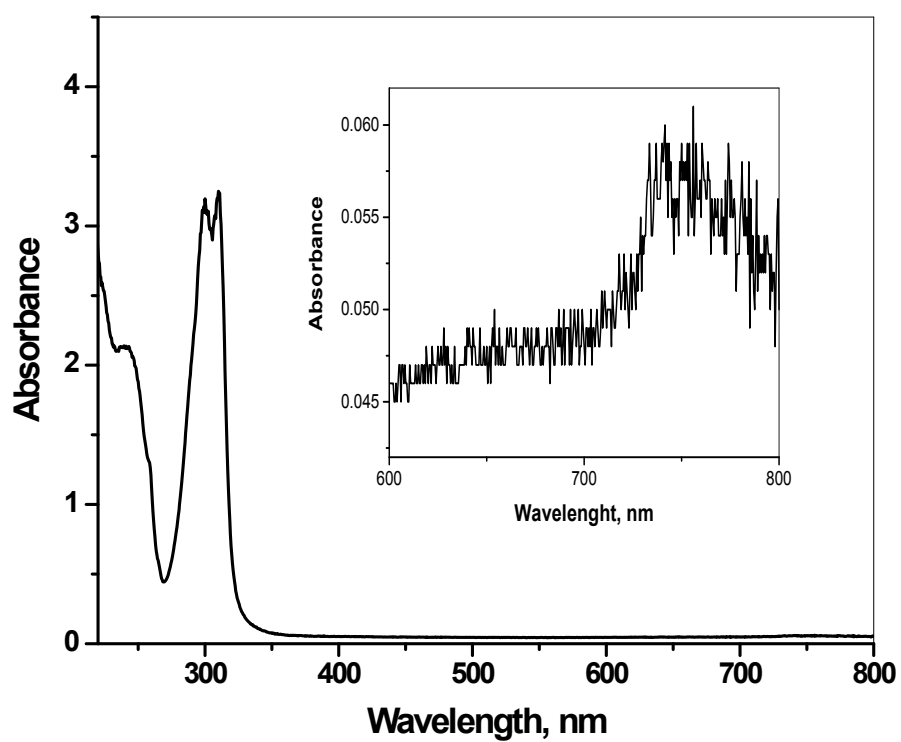

**Figure S1.** UV-Vis spectrum of Copper complex in the range of 220-800 nm. Inset highlight the absorbance in the range of 600-800 nm.

**Figure S2**

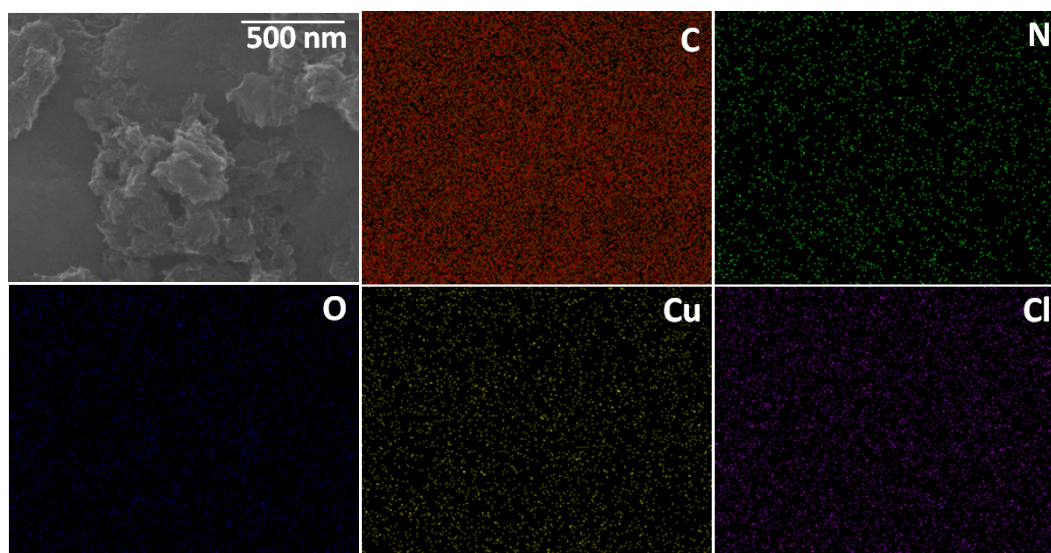

**Figure S2.** FESEM micrographs and corresponding elemental mapping images of GrN<sub>700</sub>-CuC. The uniform distribution of copper and chlorine revealed the regular grafting of copper complex on the N-doped graphene.

**Figure S3**

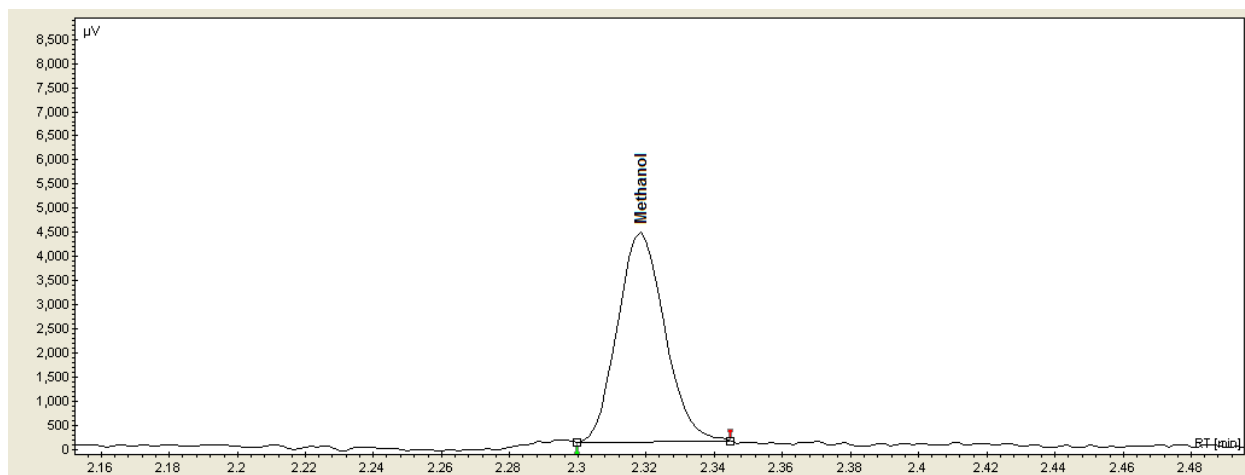

**Figure S3.** Gas chromatogram of photoreaction product after 24 hours of visible light irradiation using GrN<sub>700</sub>-CuC catalyst.

**Figure S4**

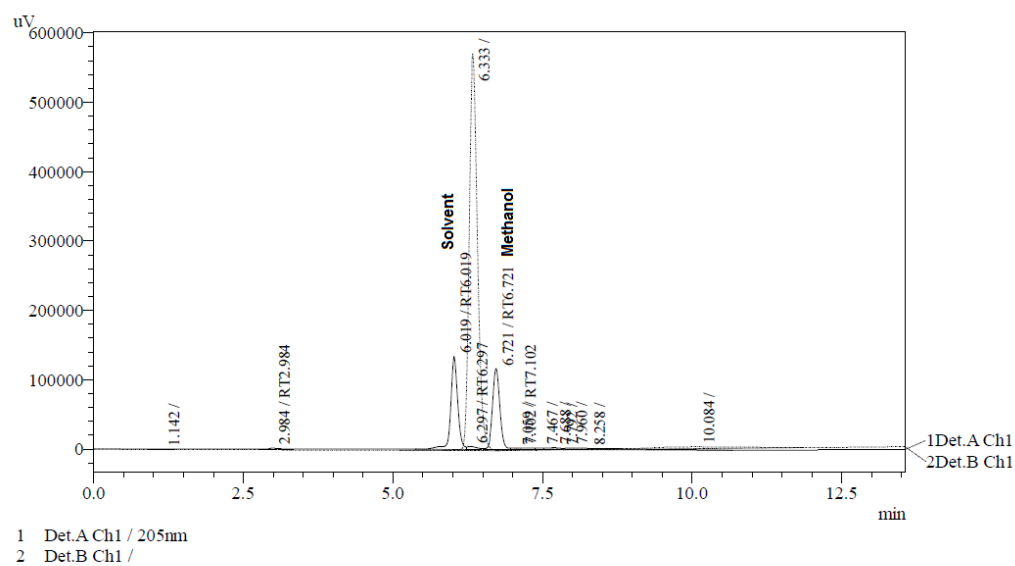

## Results

PeakTable

| Peak# | Ret. Time | Area    | Height | Area %  | Height % |
|-------|-----------|---------|--------|---------|----------|
| 1     | 2.984     | 16732   | 1864   | 0.685   | 0.698    |
| 2     | 6.019     | 1119501 | 134543 | 45.830  | 50.351   |
| 3     | 6.297     | 49923   | 4295   | 2.044   | 1.607    |
| 4     | 6.721     | 976287  | 116834 | 39.967  | 43.723   |
| 5     | 7.102     | 56700   | 2393   | 2.321   | 0.896    |
| 6     | 7.467     | 20647   | 2301   | 0.845   | 0.861    |
| 7     | 7.688     | 43510   | 2707   | 1.781   | 1.013    |
| 8     | 7.960     | 159419  | 2272   | 6.526   | 0.850    |
| Total |           | 2442718 | 267211 | 100.000 | 100.000  |

Methanol

**Figure S4.** HPLC chromatogram of photoreaction product after 24 hours of visible light irradiation using GrN<sub>700</sub>-CuC catalyst, based on UV and RI detectors signals.

**Figure S5**

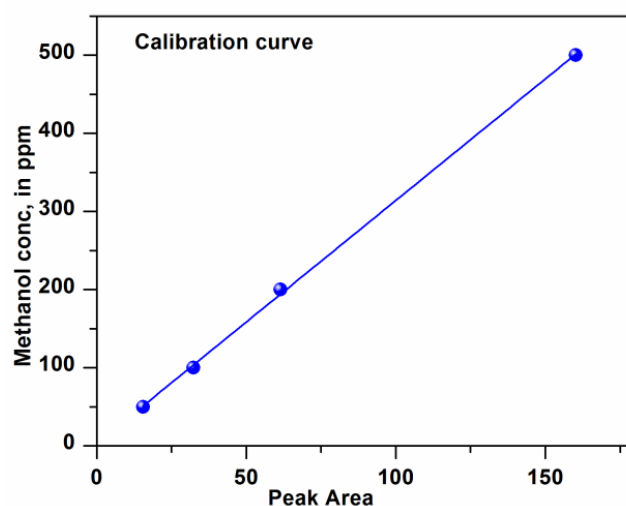

**Figure S5.** GC calibration curve for the quantification of methanol

**Table S1.** Elemental Distribution (atomic % ) based on XPS analysis of samples

| Sample Description      | C     | O     | N    | Cu   | Cl   |
|-------------------------|-------|-------|------|------|------|
| GO                      | 64.10 | 35.90 | -    | -    | -    |
| GrN <sub>700</sub> -CuC | 84.46 | 6.93  | 6.01 | 1.96 | 0.64 |
